# Supplementary material for: Identification of Novel Smoothened Ligands Using Structure-Based Docking
Source: PubMed Central journal article supplement (PMC4973902; doi:10.1371/journal.pone.0160365), 2016-08-04
Supplement: pone.0160365.s004.pdf [file pone.0160365.s004.pdf]

## S1 Table Results of first screen

| Rank | Compound  | Inhibition of Gli-Luciferase | IC <sub>50</sub> $\mu$ M (range, n) | Inhibition - Gli1 qPCR | IC <sub>50</sub> $\mu$ M (range, n) | Binding | IC <sub>50</sub> $\mu$ M (range, n) |
|------|-----------|------------------------------|-------------------------------------|------------------------|-------------------------------------|---------|-------------------------------------|
| 3    | C55270268 | yes                          | 43.0<br>(28.3-63.0, 4)              | yes                    | 94.8<br>(72.0-124.9, 3)             | yes     | 166<br>(130-212, 2)                 |
| 6    | C48326431 | yes                          | 20.8<br>(12.7-34.2, 3)              | yes                    | 109<br>(50.3-237.8, 3)              |         |                                     |
| 15   | C25216461 | no                           |                                     | no                     |                                     |         |                                     |
| 22   | C67090834 | no                           |                                     |                        |                                     |         |                                     |
| 42   | C66303859 | no                           |                                     |                        |                                     |         |                                     |
| 44   | C72143438 | yes                          | 34.4<br>(7.6-155, 3)                | yes                    | 14.0<br>(11.4-17.3, 2)              | yes     | 15.6<br>(8.2-3.0, 3)                |
| 45   | C08112633 | no                           |                                     |                        |                                     |         |                                     |
| 62   | C71853530 | no                           |                                     |                        |                                     |         |                                     |
| 77   | C69810396 | no                           |                                     |                        |                                     |         |                                     |
| 79   | C67472686 | no                           |                                     |                        |                                     |         |                                     |
| 96   | C44950101 | no                           |                                     |                        |                                     |         |                                     |
| 109  | C69457212 | no                           |                                     |                        |                                     |         |                                     |
| 120  | C31712840 | no                           |                                     |                        |                                     |         |                                     |
| 164  | C58316861 | no                           |                                     |                        |                                     |         |                                     |
| 197  | C66148997 | no                           |                                     |                        |                                     |         |                                     |
| 230  | C79031196 | no                           |                                     |                        |                                     |         |                                     |
| 244  | C72431875 | yes                          | 5.3<br>(3.0-9.5, 3)                 | yes                    | 11.3<br>(2.2-58.1, 1)               | yes     | 58.3<br>(26.2-130, 1)               |
| 265  | C82230248 | no                           |                                     |                        |                                     |         |                                     |
| 278  | C12802040 | no                           |                                     |                        |                                     |         |                                     |
| 377  | C11697764 | no                           |                                     |                        |                                     |         |                                     |
| 427  | C77929373 | no                           |                                     |                        |                                     |         |                                     |
