# Supplementary material for: Identification of Novel Smoothened Ligands Using Structure-Based Docking
Source: PubMed Central journal article supplement (PMC4973902; doi:10.1371/journal.pone.0160365), 2016-08-04
Supplement: pone.0160365.s005.pdf [file pone.0160365.s005.pdf]

**S2 Table Results of analog screen**

| Compound number | Rank | Compound           | Inhibition of Gli-Luciferase | IC <sub>50</sub> μM (range, n) | Inhibition - mGli1 qPCR | IC <sub>50</sub> μM (range, n) | Binding | IC <sub>50</sub> μM (range, n) |
|-----------------|------|--------------------|------------------------------|--------------------------------|-------------------------|--------------------------------|---------|--------------------------------|
| 1b              | 61   | C72129543          | <i>aggregator*</i>           |                                |                         |                                |         |                                |
| 2b              | 43   | C72146912          | no                           |                                |                         |                                |         |                                |
| 3b              | 48   | C72158134          | yes                          |                                |                         |                                | yes     |                                |
| 4b              | 28   | C72167017          | yes                          |                                |                         |                                | yes     |                                |
| 5b              | 53   | C72168261          | yes                          |                                |                         |                                | yes     |                                |
| 6b              | 41   | C72172828          | no                           |                                |                         |                                |         |                                |
| 7b              | 52   | C72419993          | yes                          |                                |                         |                                | yes     |                                |
| 8b              | 4    | C72426960          | yes                          |                                |                         |                                |         |                                |
| 9b              | 178  | C72481543          | yes                          |                                |                         |                                |         |                                |
| 10b             | 33   | C72431634          | no                           |                                |                         |                                |         |                                |
| 11b             | 11   | C72473625          | yes                          |                                |                         |                                |         |                                |
| 12b             | 68   | C72429353          | yes                          |                                |                         |                                | yes     |                                |
| 13b             | N/A  | C55271488          | yes                          | 10.9<br>(8.2-14.5, 3)          |                         |                                |         |                                |
| 14b             | 2    | C72129787          | yes                          |                                |                         |                                |         |                                |
| 15b             | 18   | C72149026          | no                           |                                |                         |                                | yes     |                                |
| 16b             | 12   | C72149186          | yes                          |                                |                         |                                |         |                                |
| 17b             | 20   | C72149758          | yes                          |                                |                         |                                |         |                                |
| 18b             | 229  | C72150023          | no                           |                                |                         |                                | no      |                                |
| 19b             | 5    | C72150480          | yes                          | 22.4<br>(5.7-87.2, 3)          |                         |                                |         |                                |
| 20b             | 9    | C72153124          | <i>aggregator*</i>           |                                |                         |                                |         |                                |
| 21b             | 6    | C72158119          | yes                          | bell-shape (3)                 |                         |                                |         |                                |
| 22b             | 13   | C72163209          | yes                          |                                |                         |                                |         |                                |
| 23b             | 36   | C72163710          | no                           |                                |                         |                                | yes     |                                |
| 24b             | 15   | C72168023          | yes                          | bell-shape (3)                 |                         |                                |         |                                |
| 25b             | 34   | C72168579          | yes                          | 2.3<br>(1.5-3.6, 3)            | yes                     | 7.8<br>(4.0-15.1, 3)           |         |                                |
| 26b             | 3    | C72408285          | yes                          |                                |                         |                                |         |                                |
| 27b             | 1    | C72420973          | <i>aggregator*</i>           |                                |                         |                                |         |                                |
| 28b             | 228  | C72435718          | no                           |                                |                         |                                | yes     |                                |
| 29b             | 107  | C72447326          | yes                          |                                |                         |                                |         |                                |
| 30b             | 10   | C72448241          | yes                          |                                |                         |                                |         |                                |
| 31b             | 227  | C72457741          | yes                          |                                |                         |                                | no      |                                |
| 32b             | 224  | C72477710          | yes                          | 9.4<br>(5.8-15.0, 3)           | yes                     | 12.7<br>(3.8-42.3, 3)          | yes     |                                |
| 33b             | 19   | C72476169          | yes                          |                                |                         |                                |         |                                |
| 34b             | 35   | C72480679          | yes                          |                                |                         |                                |         |                                |
| 35b             | 159  | C72428267          | no                           |                                |                         |                                |         |                                |
| 36b             | 96   | C72433192          | no                           |                                |                         |                                |         |                                |
| 37b             | 54   | C72146027          | yes                          | 5.4<br>(3.8-7.6, 3)            | yes                     | 8.8<br>(5.2-14.9, 3)           |         |                                |
| 38b             | 231  | C72170378          | no                           |                                |                         |                                |         |                                |
| 39b             | 204  | C72152697          | no                           |                                |                         |                                |         |                                |
| 40b             | 114  | C72167102          | <i>aggregator*</i>           |                                |                         |                                |         |                                |
| 41b             | 126  | C72479818          | no                           |                                |                         |                                |         |                                |
| 42b             | 186  | C72162059          | no                           |                                |                         |                                |         |                                |
| 43b             | 31   | C72447879          | yes                          | 13.3<br>(5.7-31.2, 3)          | yes                     |                                |         |                                |
| 44b             | 185  | C72163442          | yes                          |                                |                         |                                |         |                                |
| 45b             | 76   | C72475536          | yes                          | 3.1<br>(1.9-5.1, 3)            | yes                     | 5.3<br>(3.8-7.5, 3)            | yes     | 12.7<br>(9.4-17.3, 3)          |
| 46b             | 230  | C72447458          | yes                          | 15.8<br>(9.0-27.8, 3)          | yes                     |                                |         |                                |
|                 |      | vismodegib<br>(nM) | yes                          | 30.6<br>(12.3-76.3, 3)         | yes                     | 1.8<br>(1.4-2.2, 3)            | yes     | 21.0<br>(13.3-33.3)            |

\**aggregator*: see S3 Table
