# Supplementary material for: Identification of Novel Smoothened Ligands Using Structure-Based Docking
Source: PubMed Central journal article supplement (PMC4973902; doi:10.1371/journal.pone.0160365), 2016-08-04
Supplement: pone.0160365.s006.pdf [file pone.0160365.s006.pdf]

### S3 Table Compounds Positive in Aggregation Counter Screen

| Compound         | Compound number | DLS                     | DLS  | AmpC                | AmpC | MDH | MDH  |
|------------------|-----------------|-------------------------|------|---------------------|------|-----|------|
|                  |                 | KPi                     | DMEM | KPi                 | DMEM | KPi | DMEM |
|                  |                 | Conc. tested ( $\mu$ M) |      | % enzyme activity** |      |     |      |
| <b>C72129543</b> | 1b              | 30                      | NA   | 11                  | NA   | 11  | NA   |
| <b>C72153124</b> | 20b             | 0.8*                    | 5*   | 82                  | 86   | 10  | 17   |
| <b>C72420973</b> | 27b             | 0.8*                    | 5*   | 15                  | 2.5  | 2   | 4.5  |
| <b>C72167102</b> | 40b             | NA                      | 5    | 60                  |      | 89  |      |

\*Compounds were not tested at lower concentrations.

\*\*Compounds were tested at 100  $\mu$ M.
