# Supplementary material for: Identification of Novel Smoothened Ligands Using Structure-Based Docking
Source: PubMed Central journal article supplement (PMC4973902; doi:10.1371/journal.pone.0160365), 2016-08-04
Supplement: pone.0160365.s007.pdf [file pone.0160365.s007.pdf]

**S4 Table Library Bias**

| Receptor<br>(Max IC <sub>50</sub> ) | Number of known<br>ligands in<br>ChEMBL19 | Number of<br>purchasable known<br>ligands | Number of<br>purchasable analogs<br>of known ligands * |
|-------------------------------------|-------------------------------------------|-------------------------------------------|--------------------------------------------------------|
| SMO<br>(1 μM)                       | 363                                       | 25                                        | 2835                                                   |
| ADRB2<br>(1 μM)                     | 1432                                      | 206                                       | 21581                                                  |
| HTR2A<br>(1 μM)                     | 3570                                      | 397                                       | 25390                                                  |
| DRD2<br>(1 μM)                      | 4939                                      | 469                                       | 26137                                                  |

\*ECFP4 cut-off = 0.8

ChEMBL 19 (Bento *et al.*, 2014; Gaulton *et al.*, 2012)
